# Supplementary material for: Hydro(solvo)thermal synthesis of homochiral metal–camphorate coordination polymers
Source: Royal Society of Chemistry journal article supplement (doi:10.1039/c000872a), 2010-01-01
Supplement: c000872a.pdf [file c000872a.pdf]

Supplementary Information for  
**Hydro(solvo)thermal synthesis of homochiral metal–camphorate coordination  
polymers**

Jing-Yun Wu,<sup>\*a</sup> Sheng-Ming Huang,<sup>ab</sup> and Ming-Hsi Chiang<sup>b</sup>

<sup>a</sup> *Department of Applied Chemistry, National Chi Nan University, Nantou 545, Taiwan. Fax: +886-49-2917956; Tel: +886-49-2910960-4918; E-mail: jyunwu@ncnu.edu.tw*

<sup>b</sup> *Institute of Chemistry, Academia Sinica, Taipei 115, Taiwan*

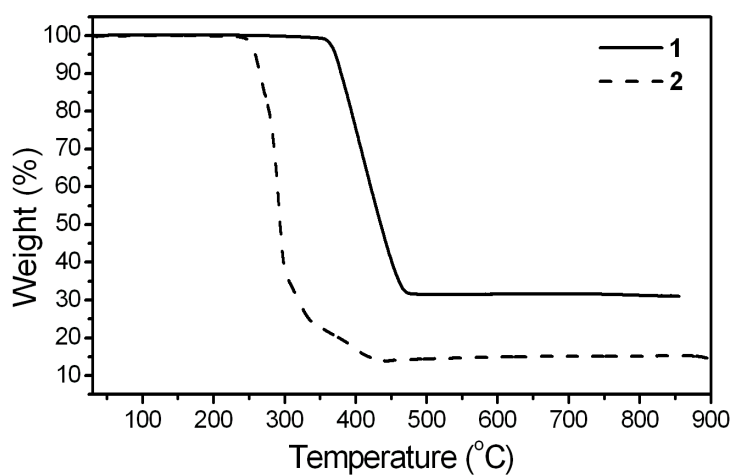

**Fig. S1** Thermogravimetric (TG) traces of **1** and **2**.

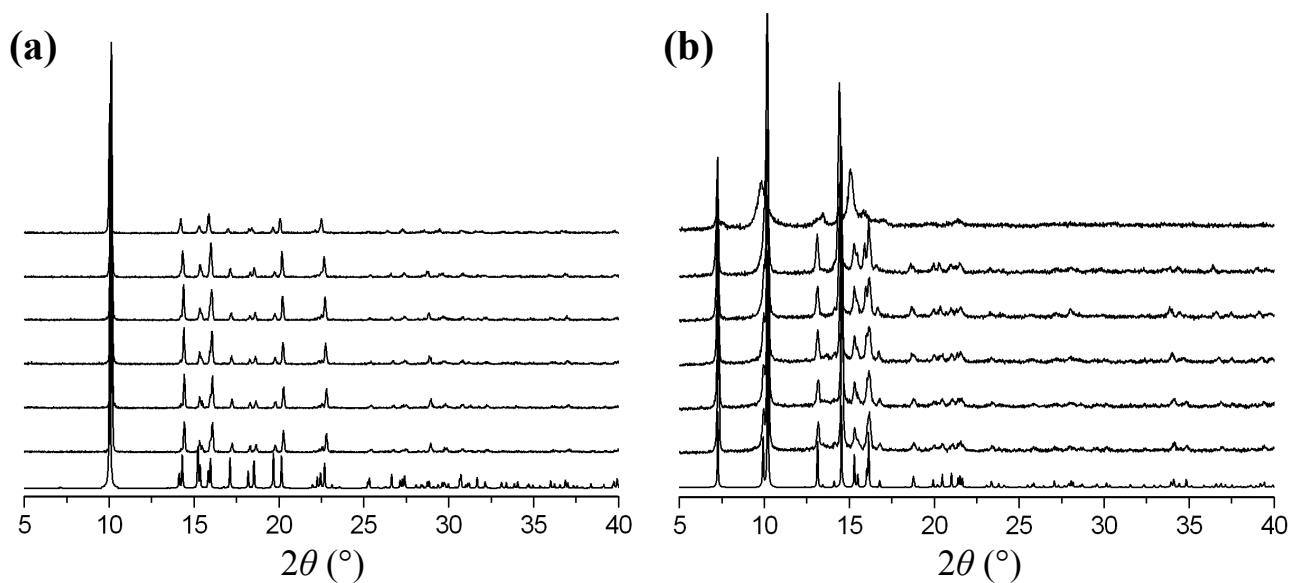

**Fig. S2** Comparison plots of PXRD for (a) **1** and (b) **2**: (bottom to up) simulated and sample at room temperature, 50 °C, 100 °C, 150 °C, 200 °C, and 250 °C.
